# Supplementary material for: Sum of peak intensities outperforms peak area integration in iTRAQ protein expression measurement by LC-MS/MS using a TripleTOF 5600+ platform
Source: PubMed Central journal article supplement (PMC6554230; doi:10.1042/bsr20190904), 2019-06-07

**A**

| Sample   | Benchmark Set | UPS 1 : protein ratio | 4-plex distribution |
|----------|---------------|-----------------------|---------------------|
| LLC PK-1 | 1             | 1:15 (UP)             | 114                 |
|          |               | 1:25 (DOWN)           | 115                 |
|          |               | 1:20 (N1)             | 116                 |
|          |               | 1:20 (N2)             | 117                 |
|          | 2             | 1:15 (UP)             | 115                 |
|          |               | 1:25 (DOWN)           | 116                 |
|          |               | 1:20 (N1)             | 117                 |
|          |               | 1:20 (N2)             | 114                 |
|          | 3             | 1:15 (UP)             | 116                 |
|          |               | 1:25 (DOWN)           | 117                 |
|          |               | 1:20 (N1)             | 114                 |
|          |               | 1:20 (N2)             | 115                 |

**B**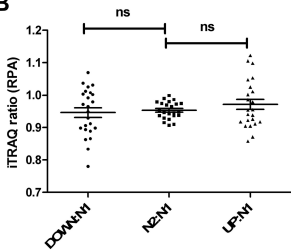**C**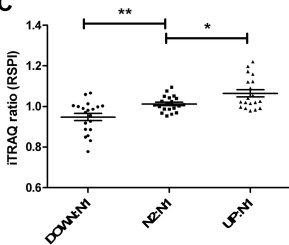

Supplement: bsr20190904_Supp1.pdf [file bsr20190904_Supp1.pdf]
